# Supplementary material for: ILDR2 stabilization is regulated by its interaction with GRP78
Source: PubMed Central journal article supplement (PMC8052334; doi:10.1038/s41598-021-87884-7), 2021-04-16

**Figure 1**

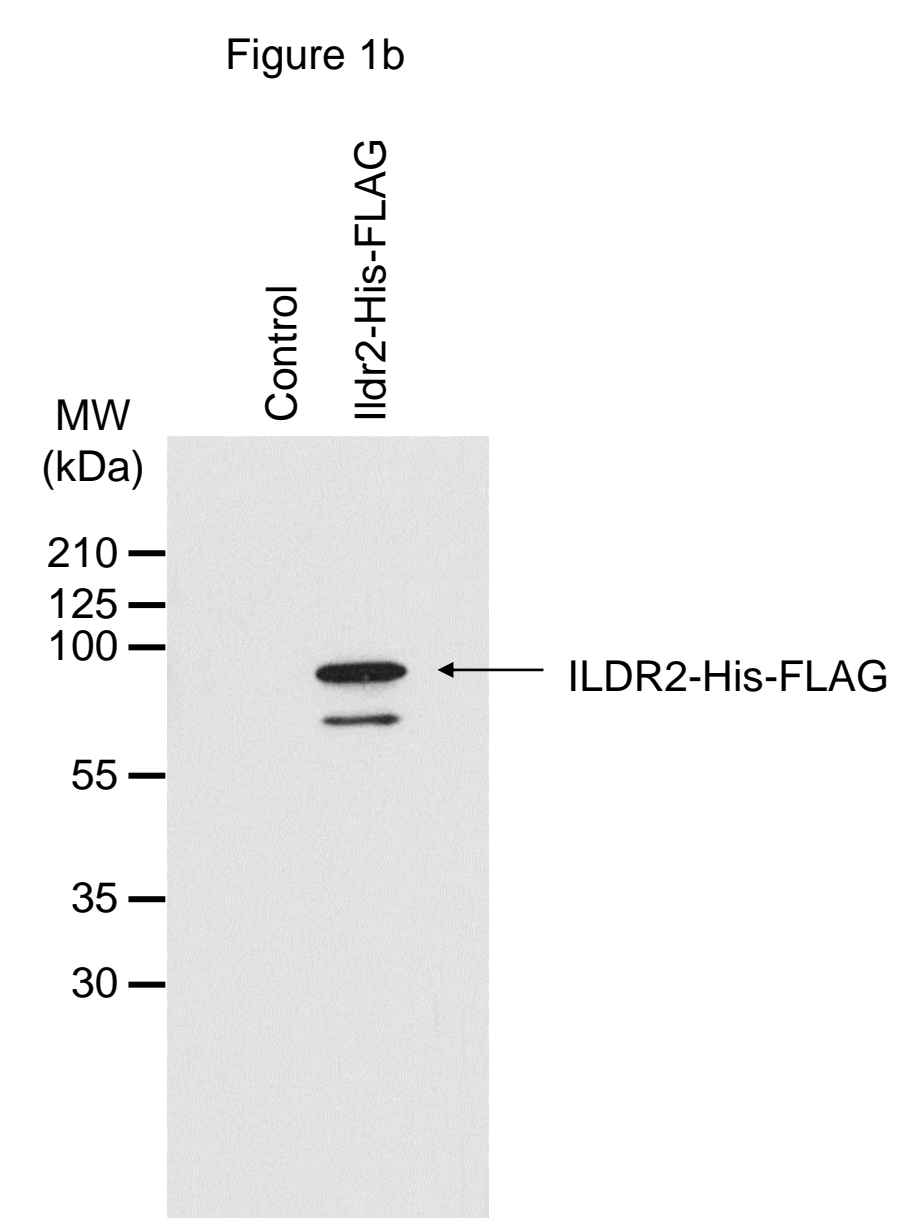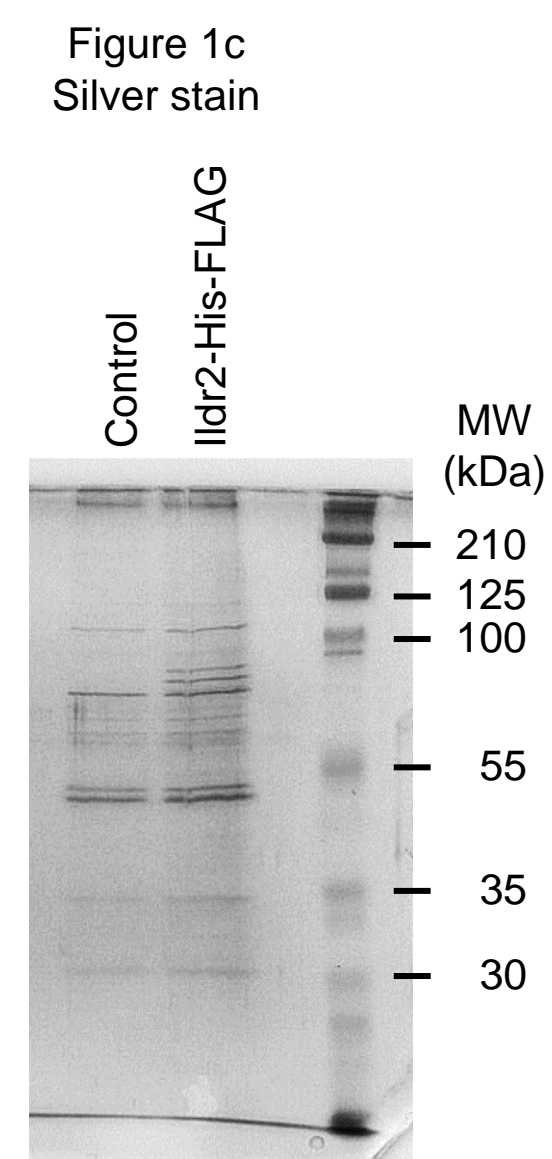

**Figure 1d**  
IP: FLAG, IB: V5

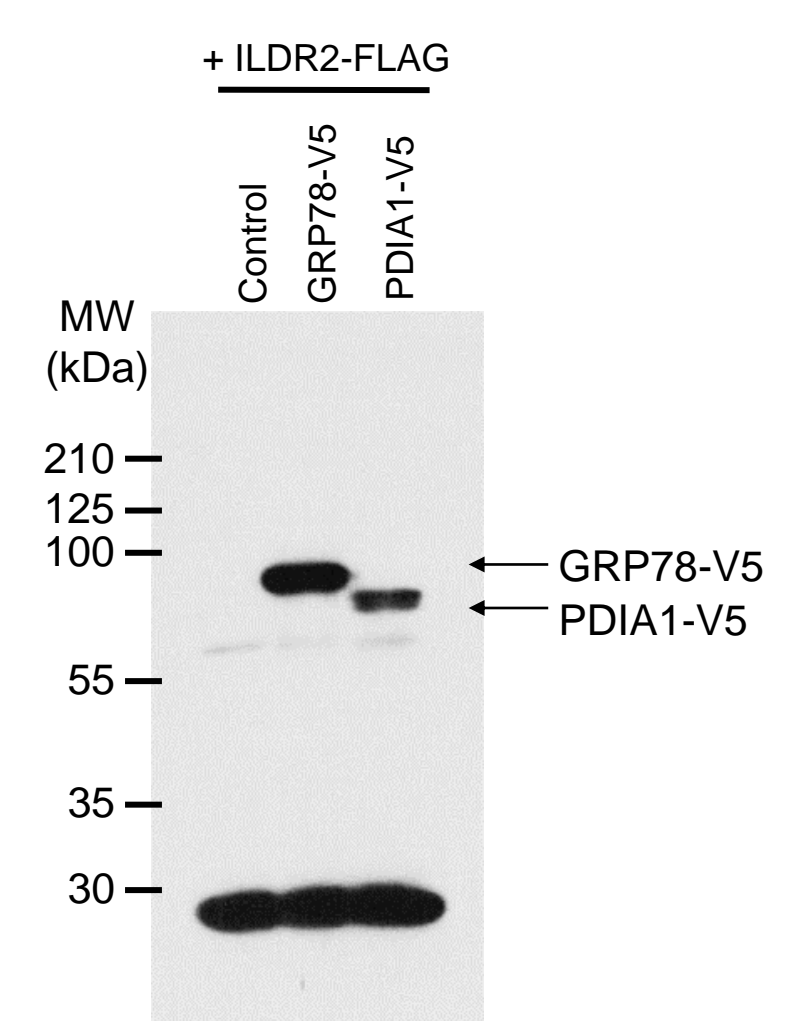

**Figure 1d**  
IP: FLAG, IB: FLAG

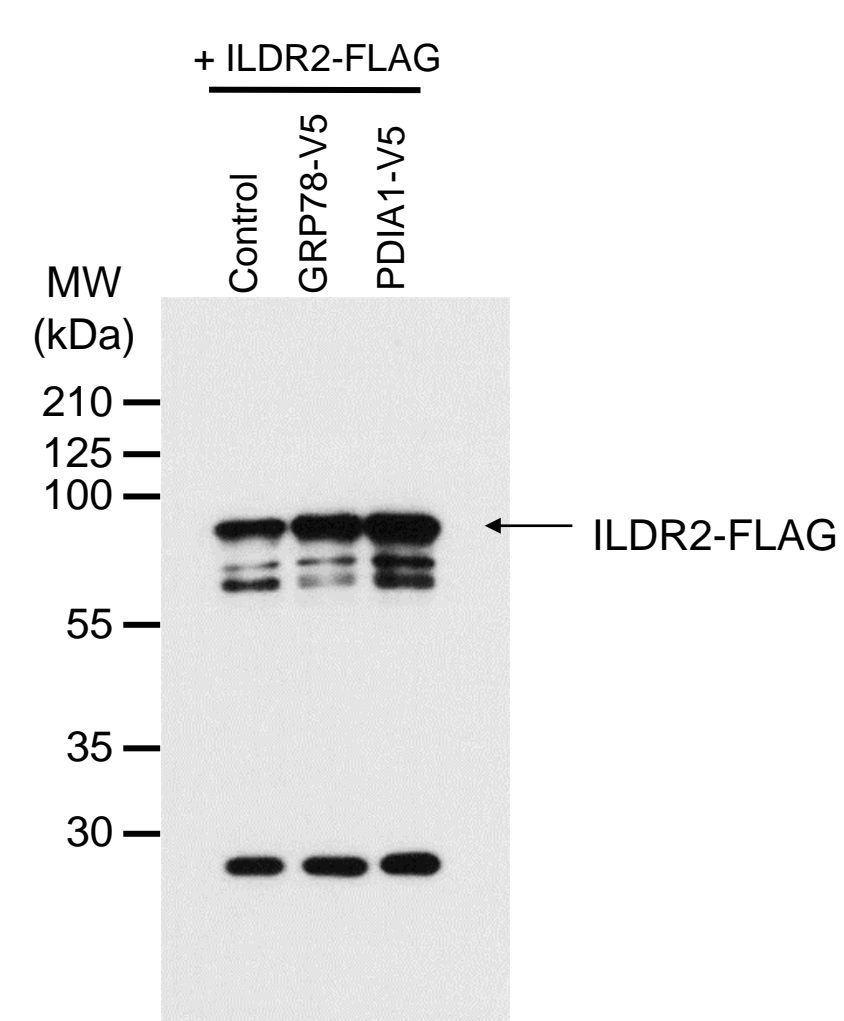

**Figure 1d**  
whole cell lysate, IB: V5

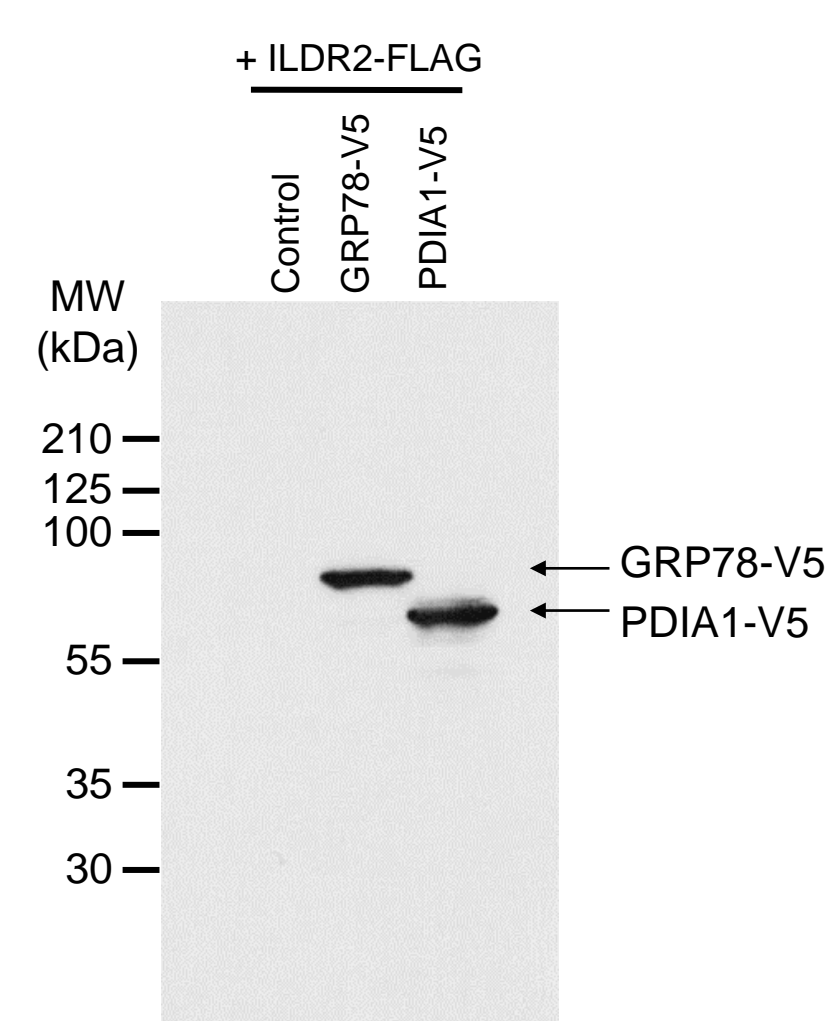

**Figure 1d**  
whole cell lysate, IB: FLAG

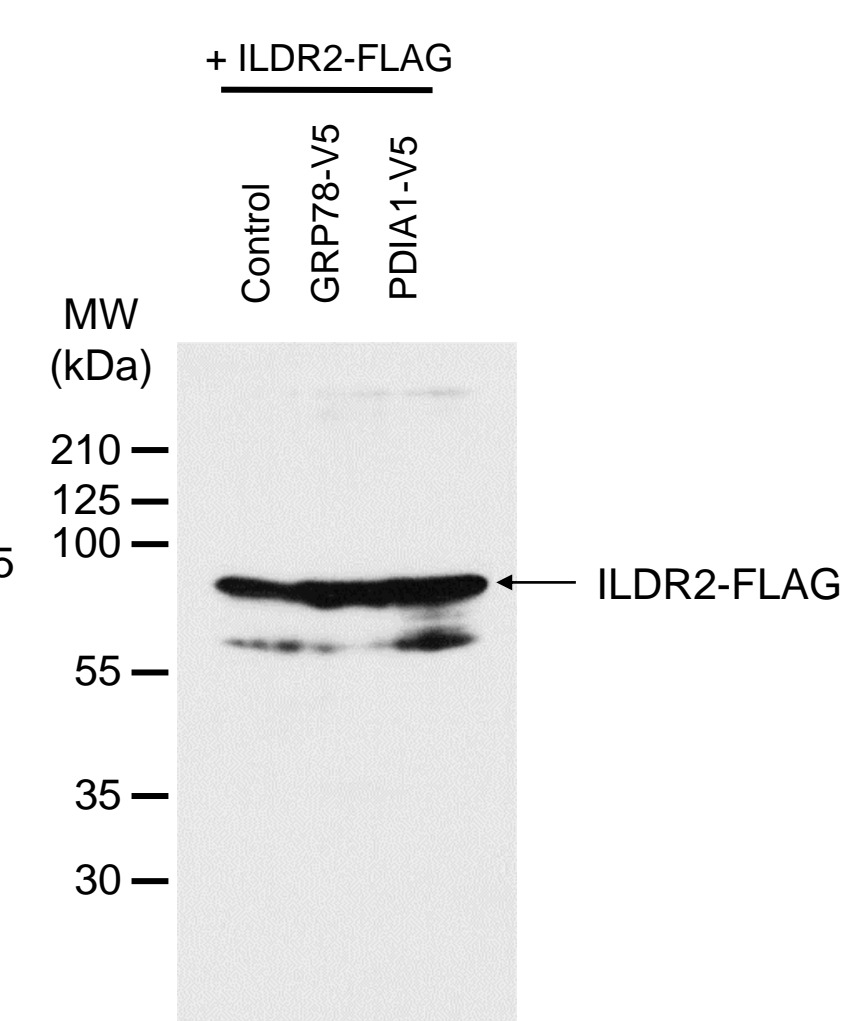



Figure 3a

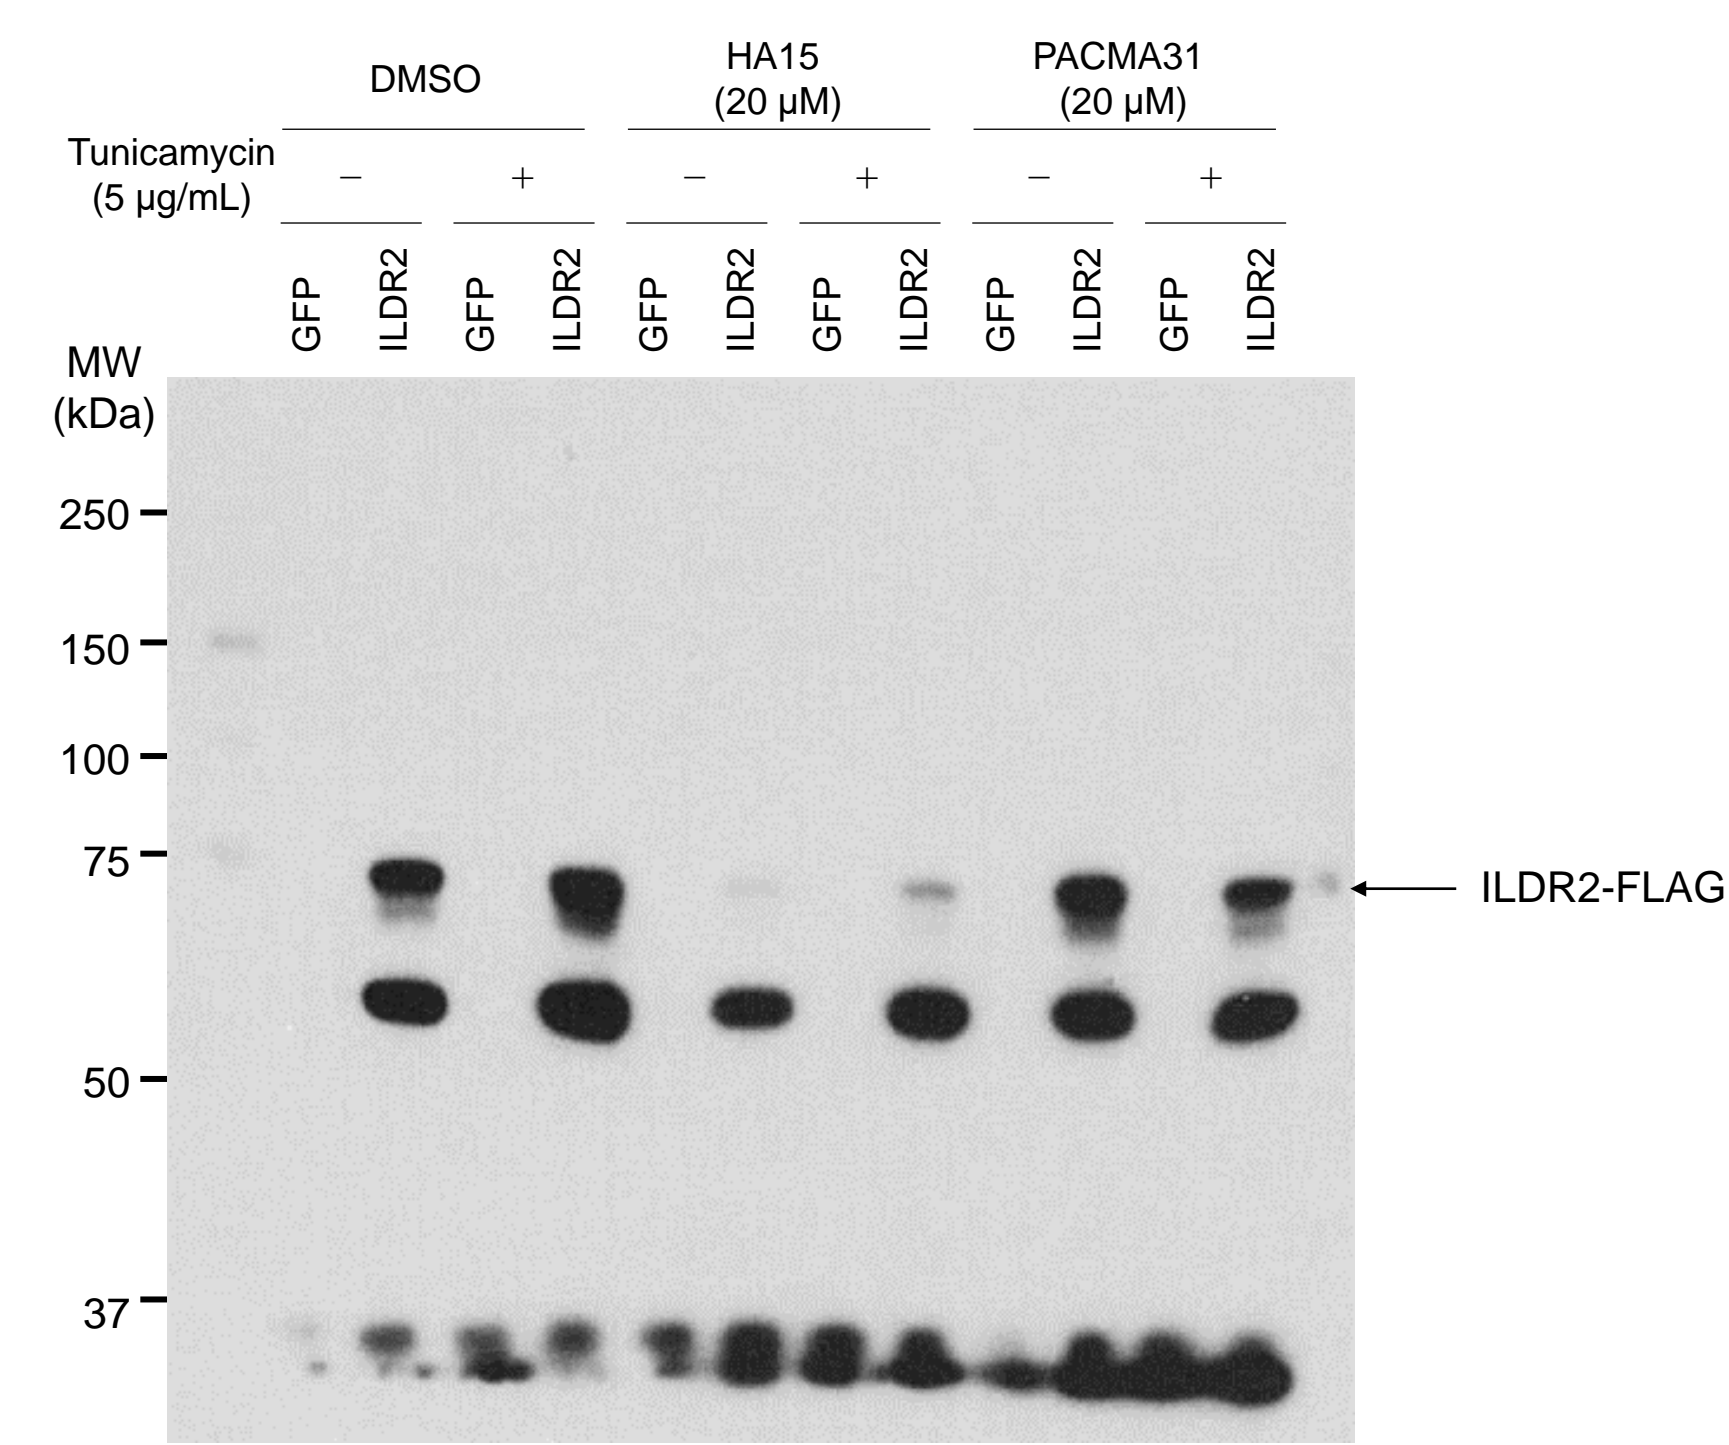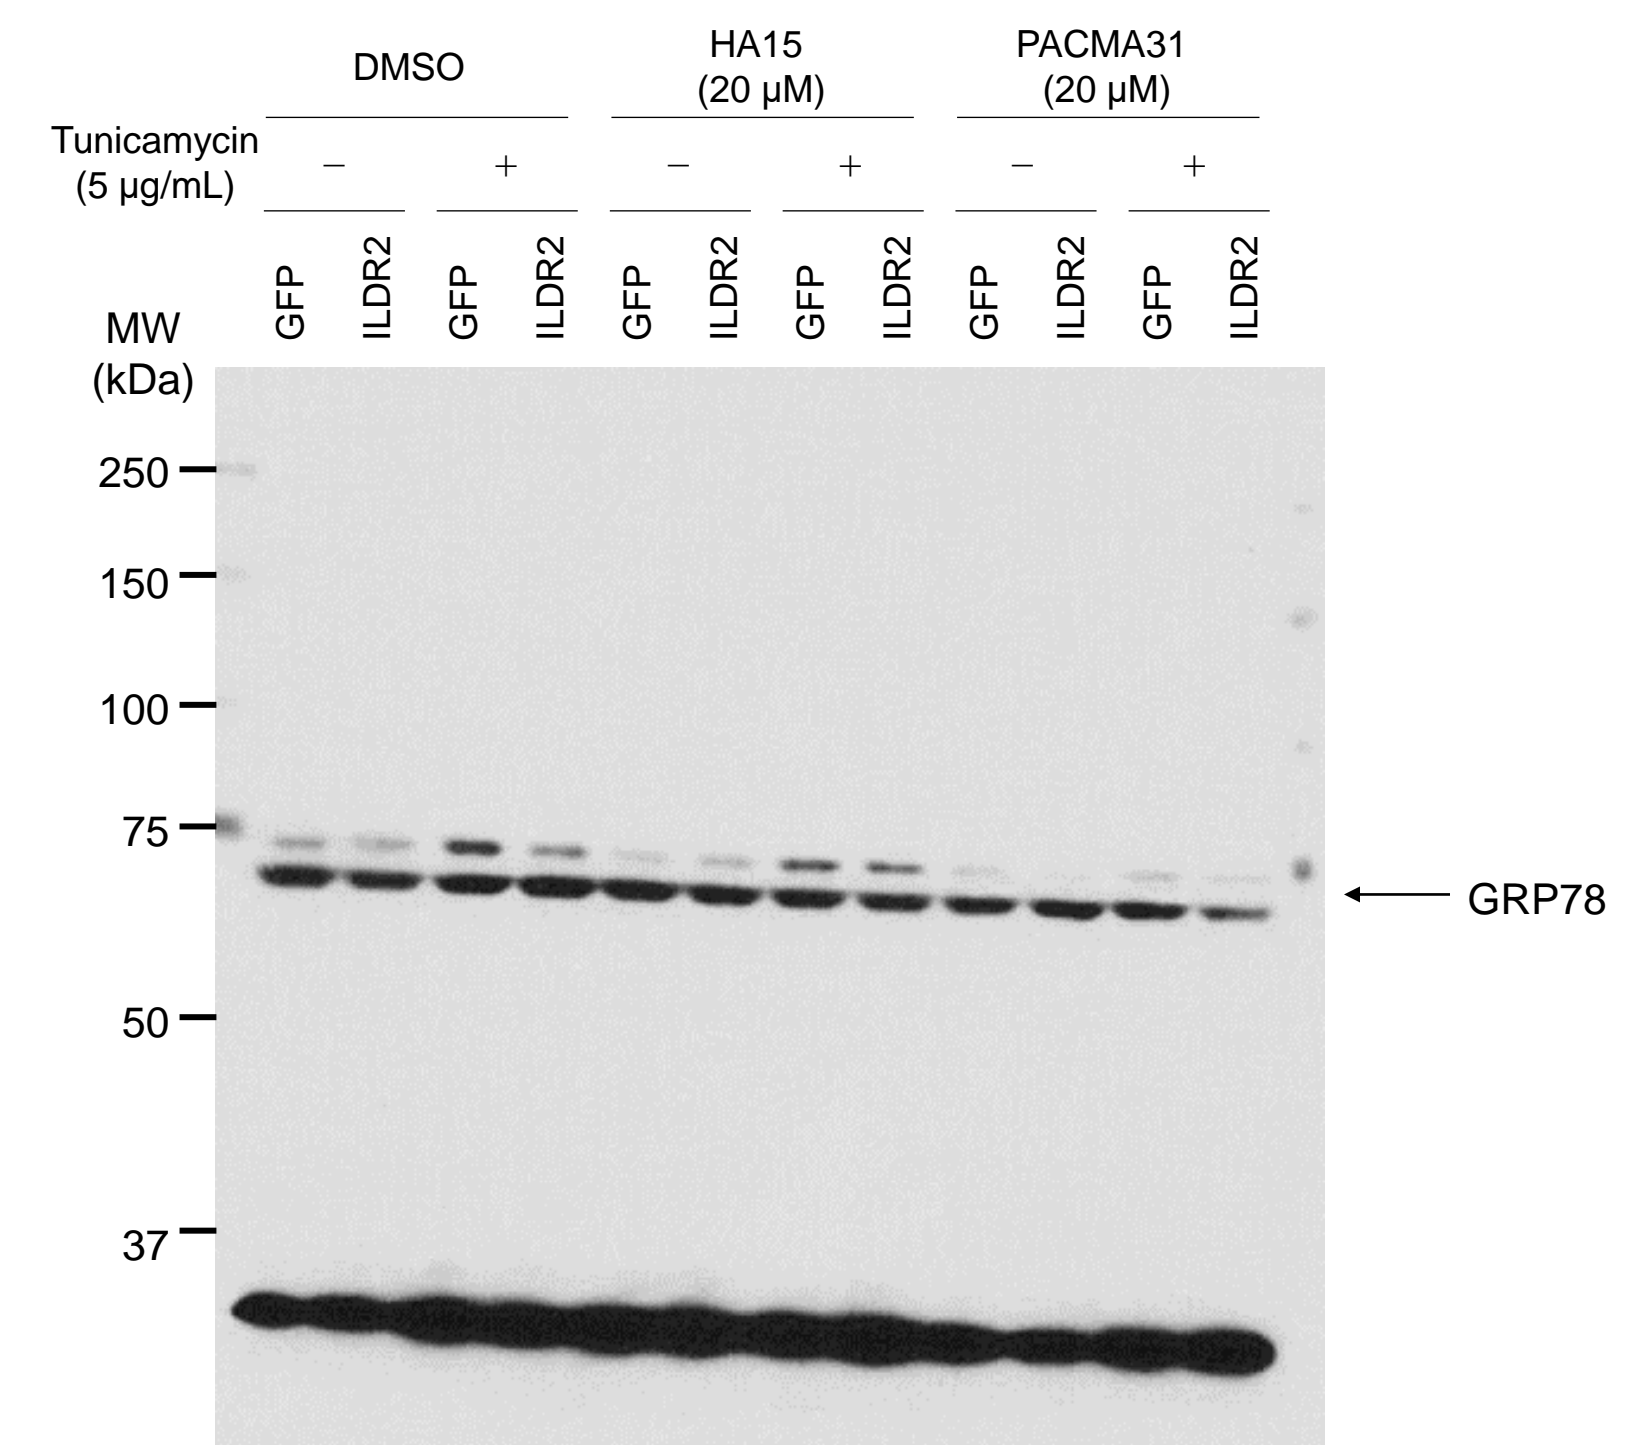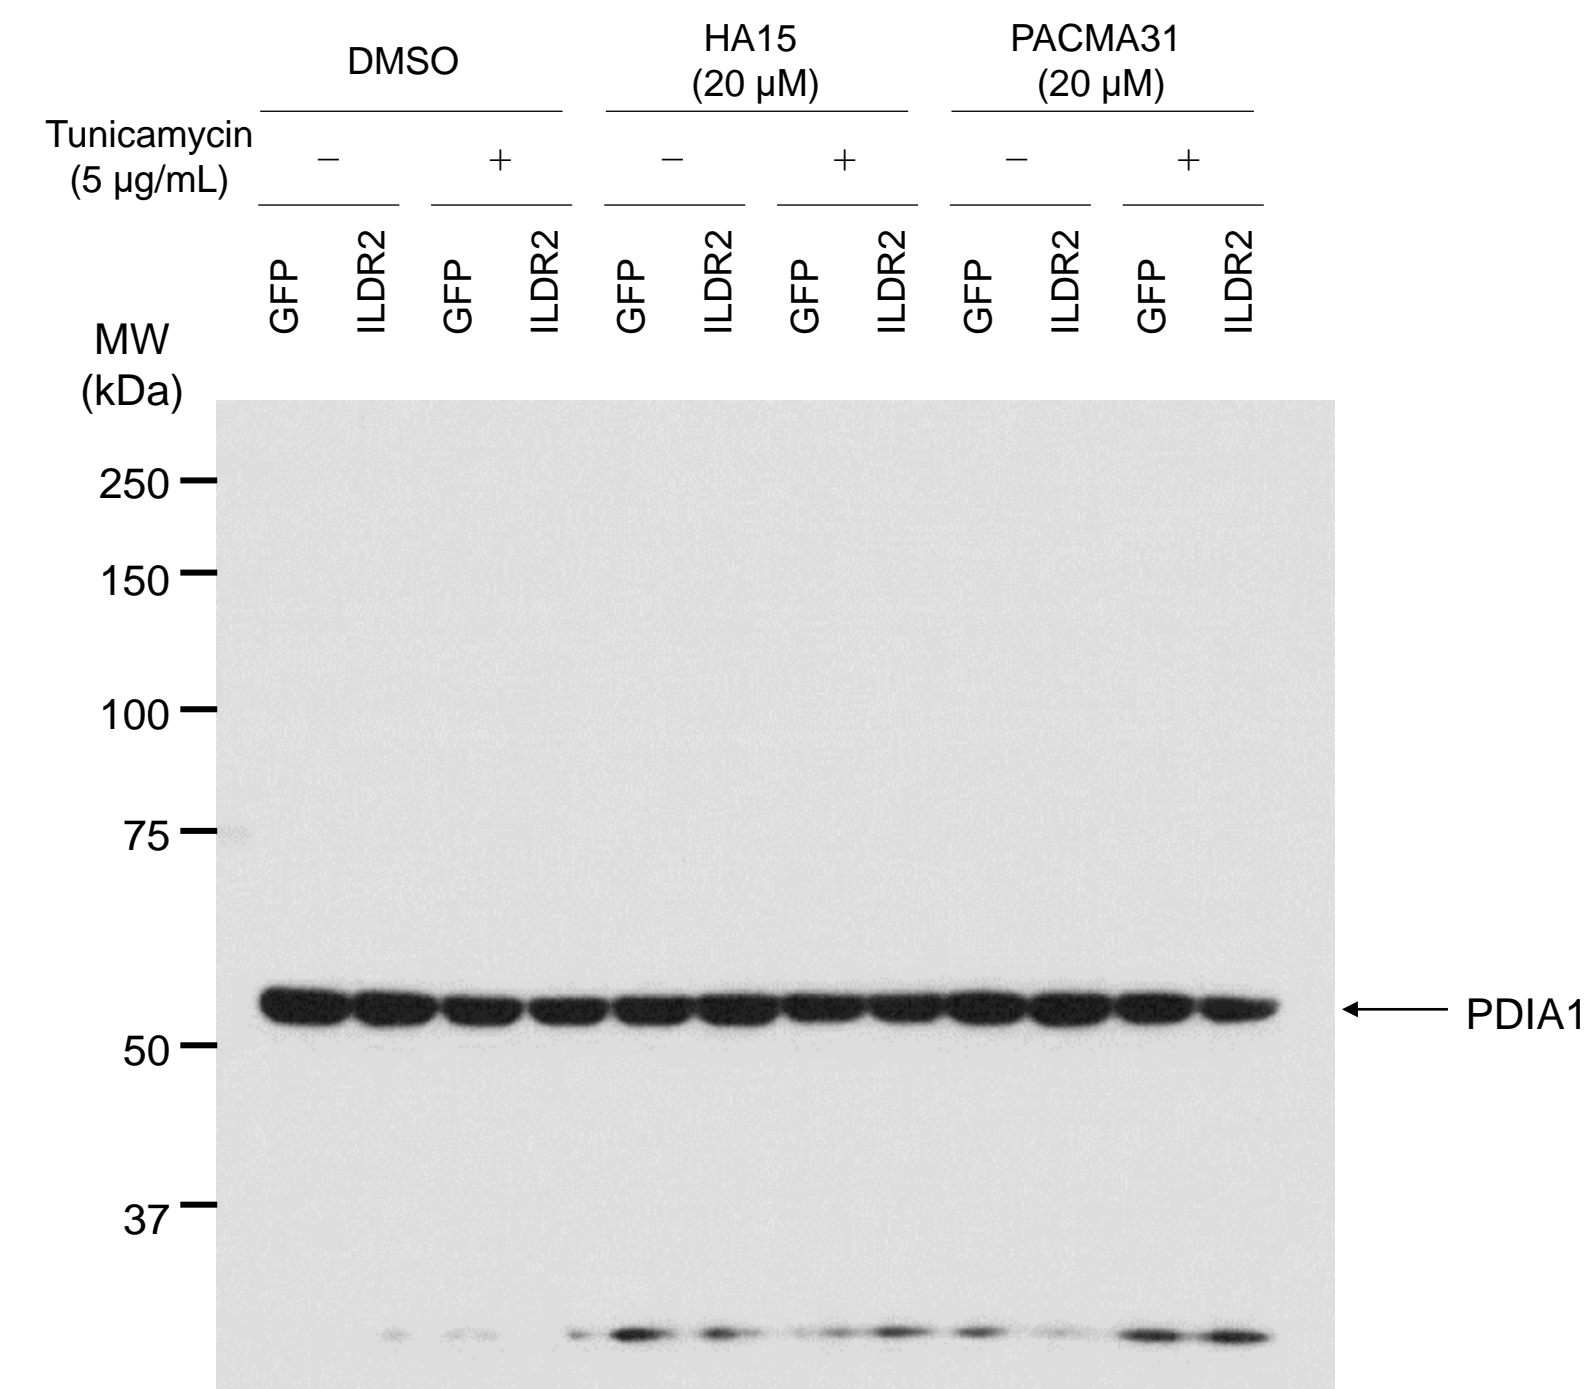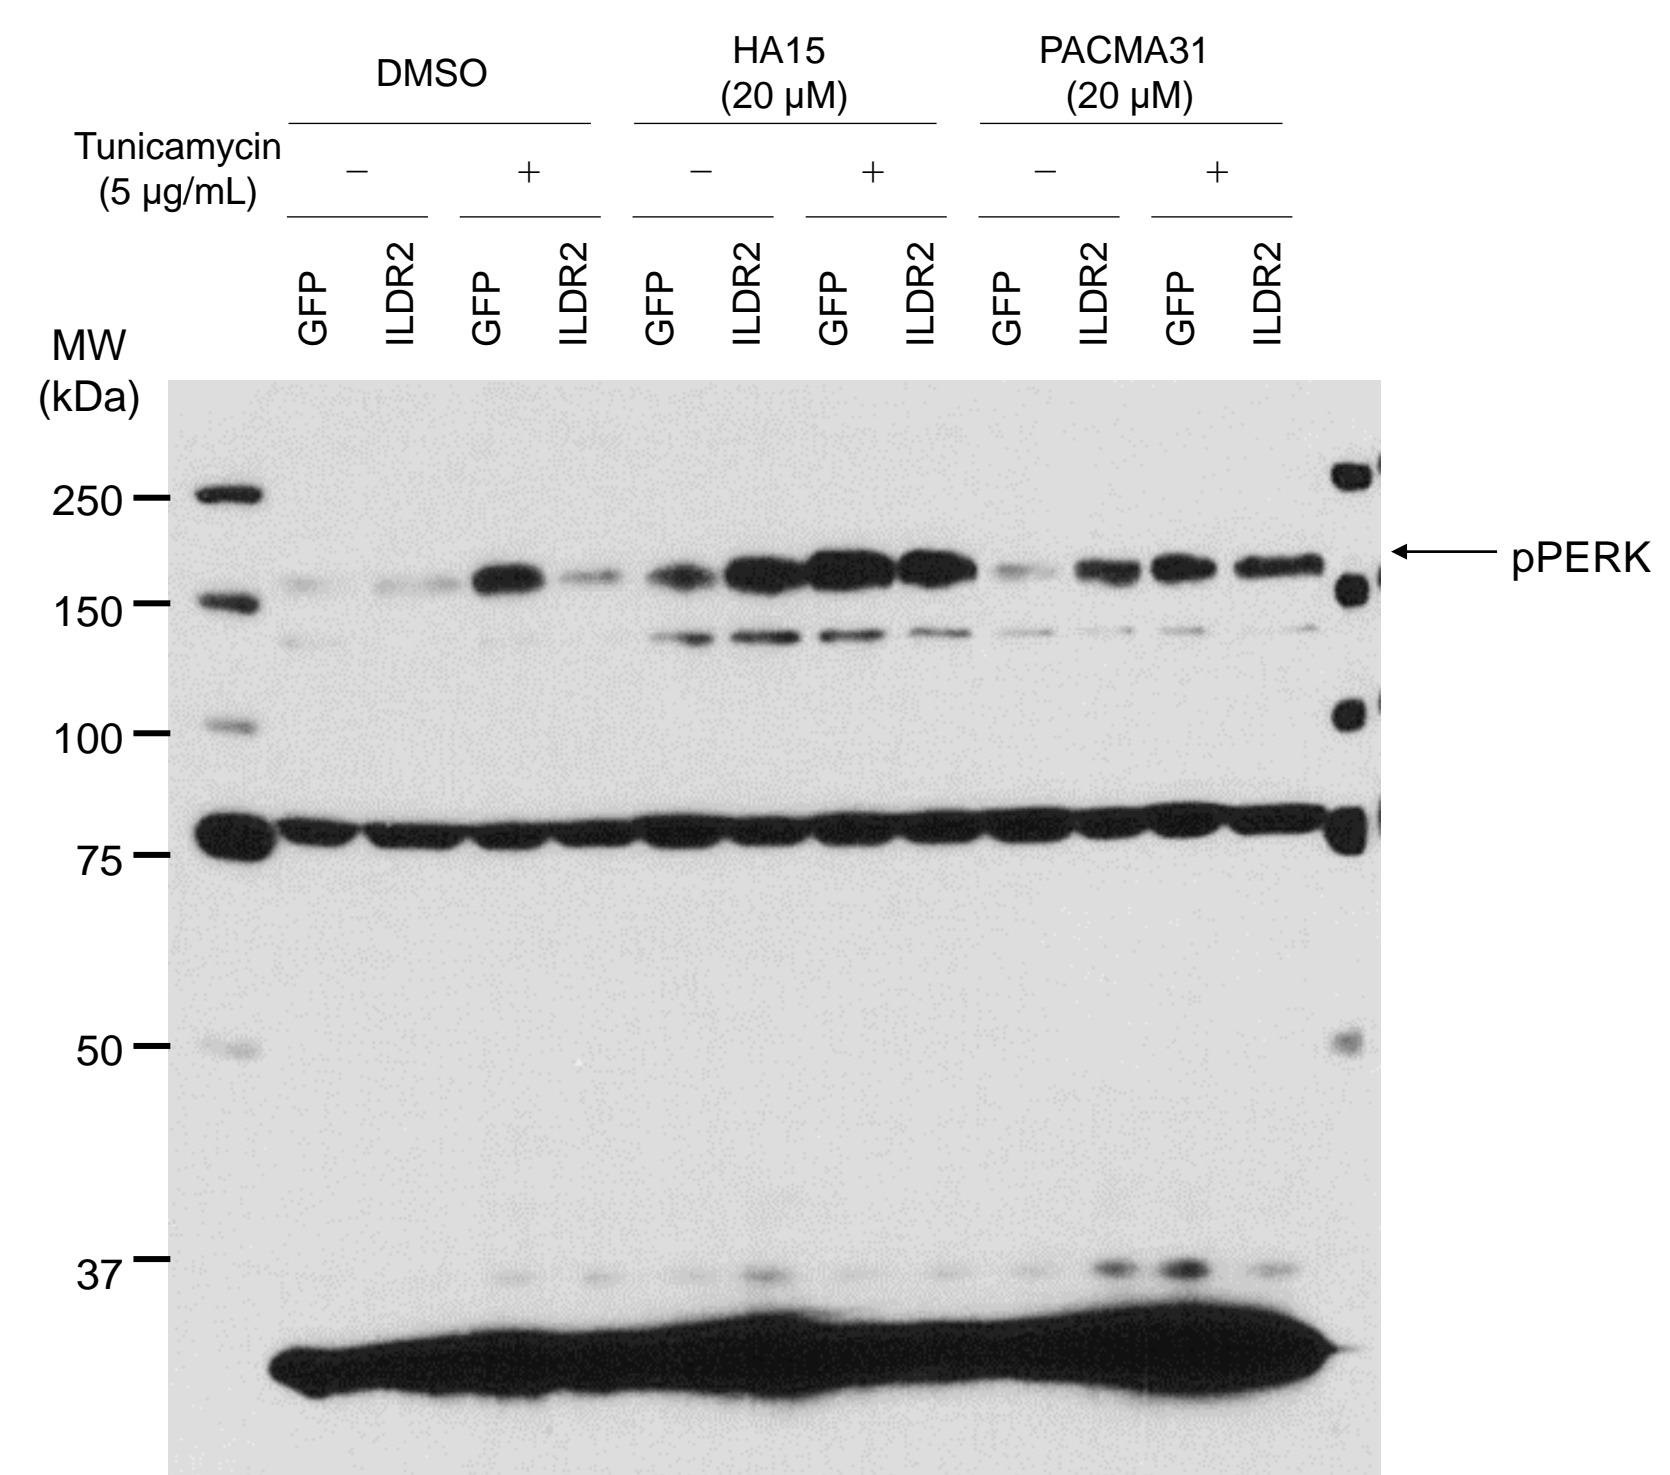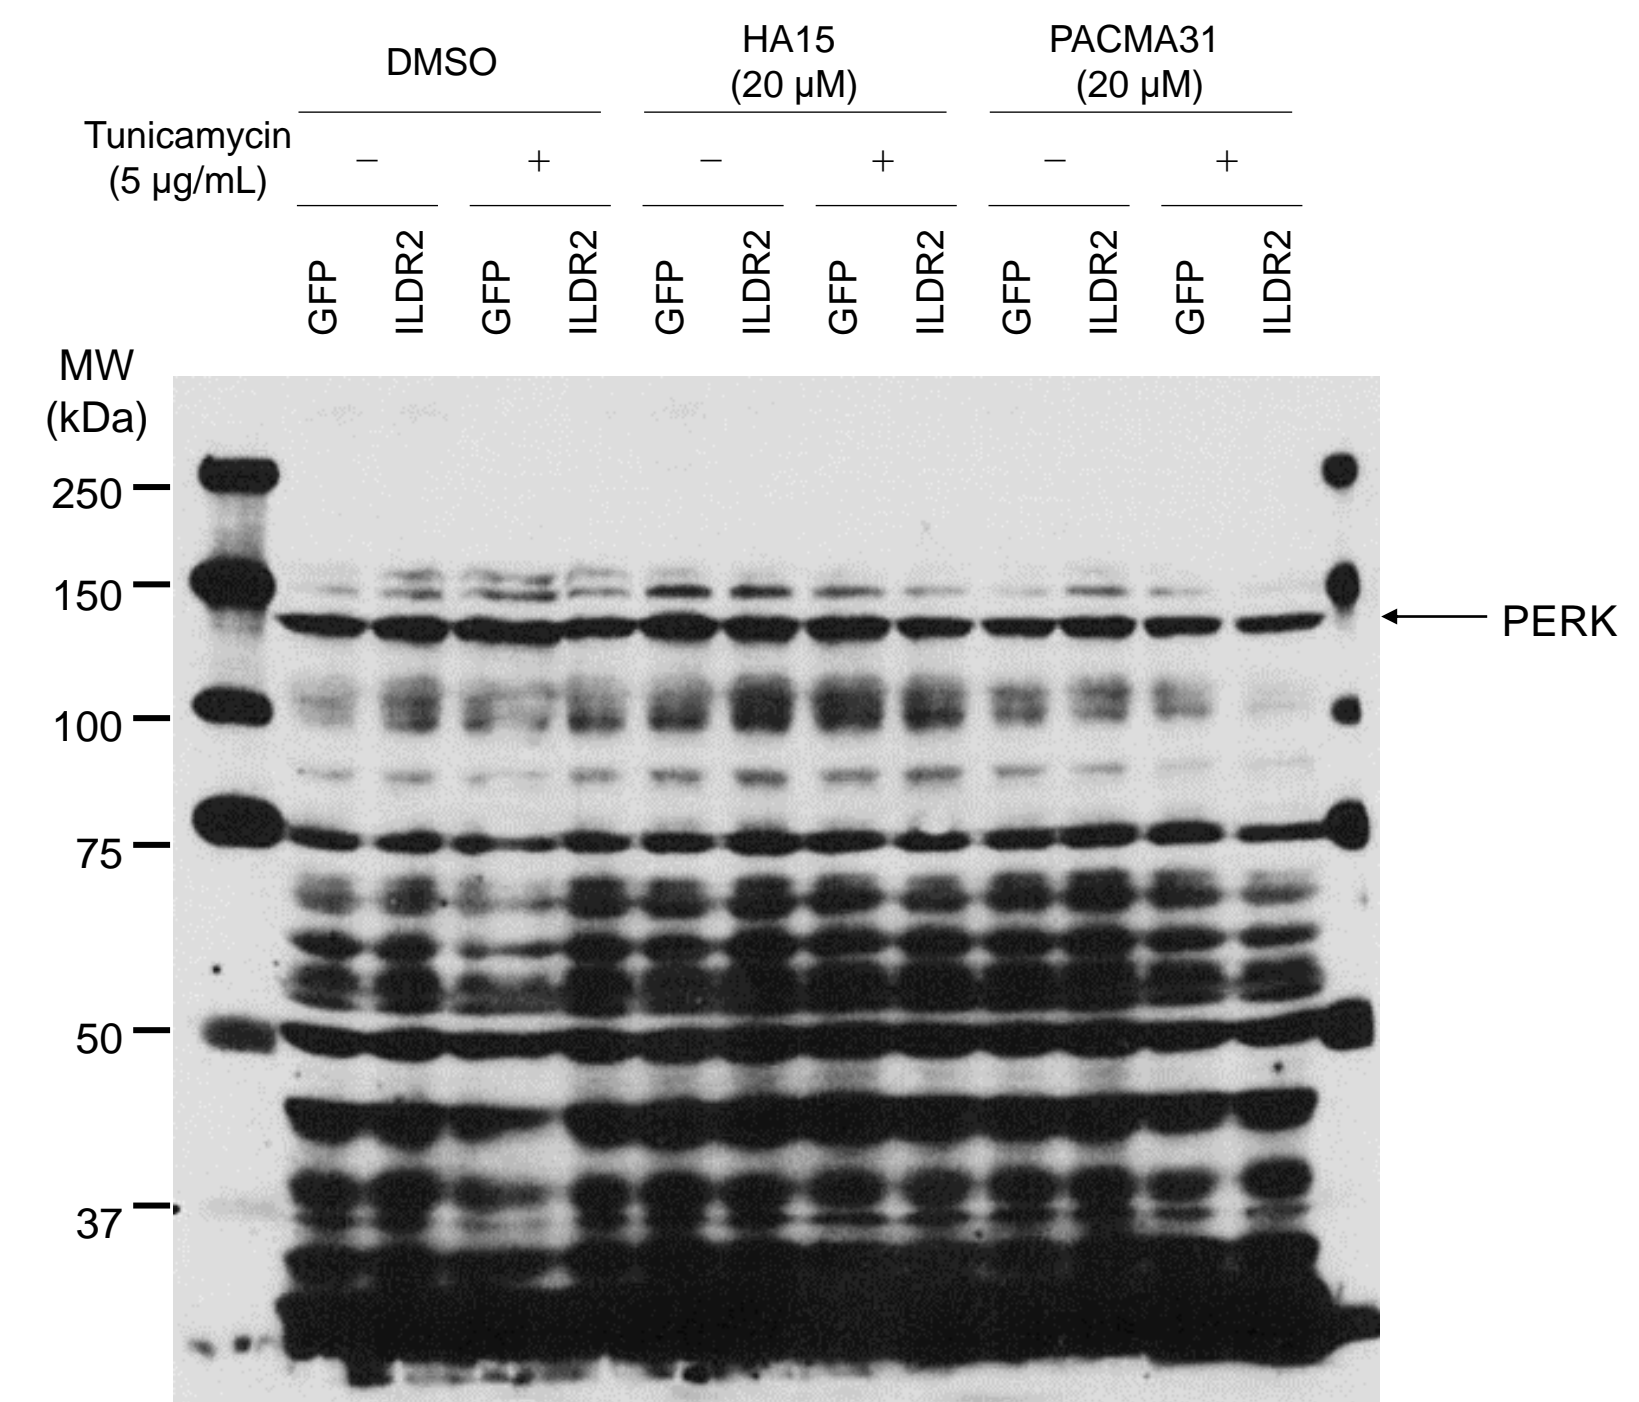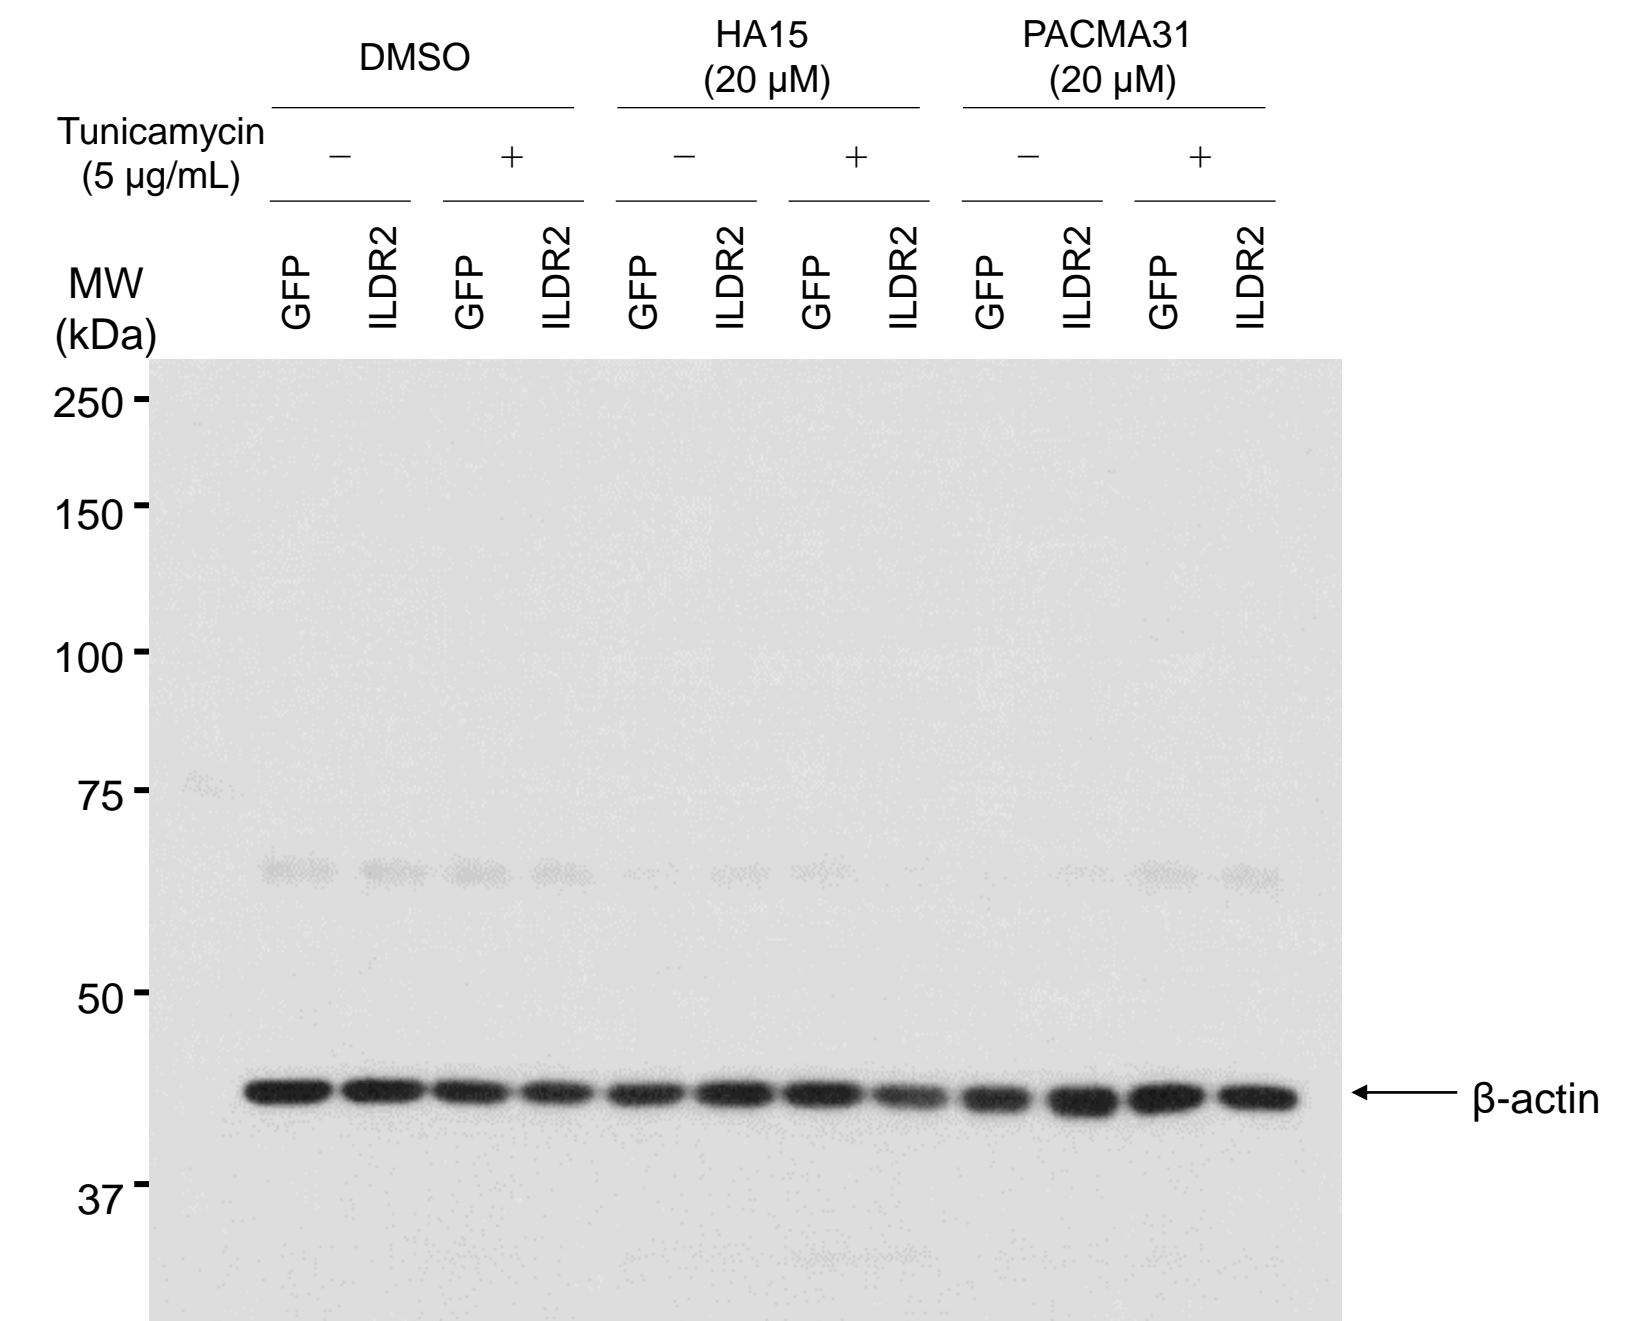

Figure 4a

IP: FLAG

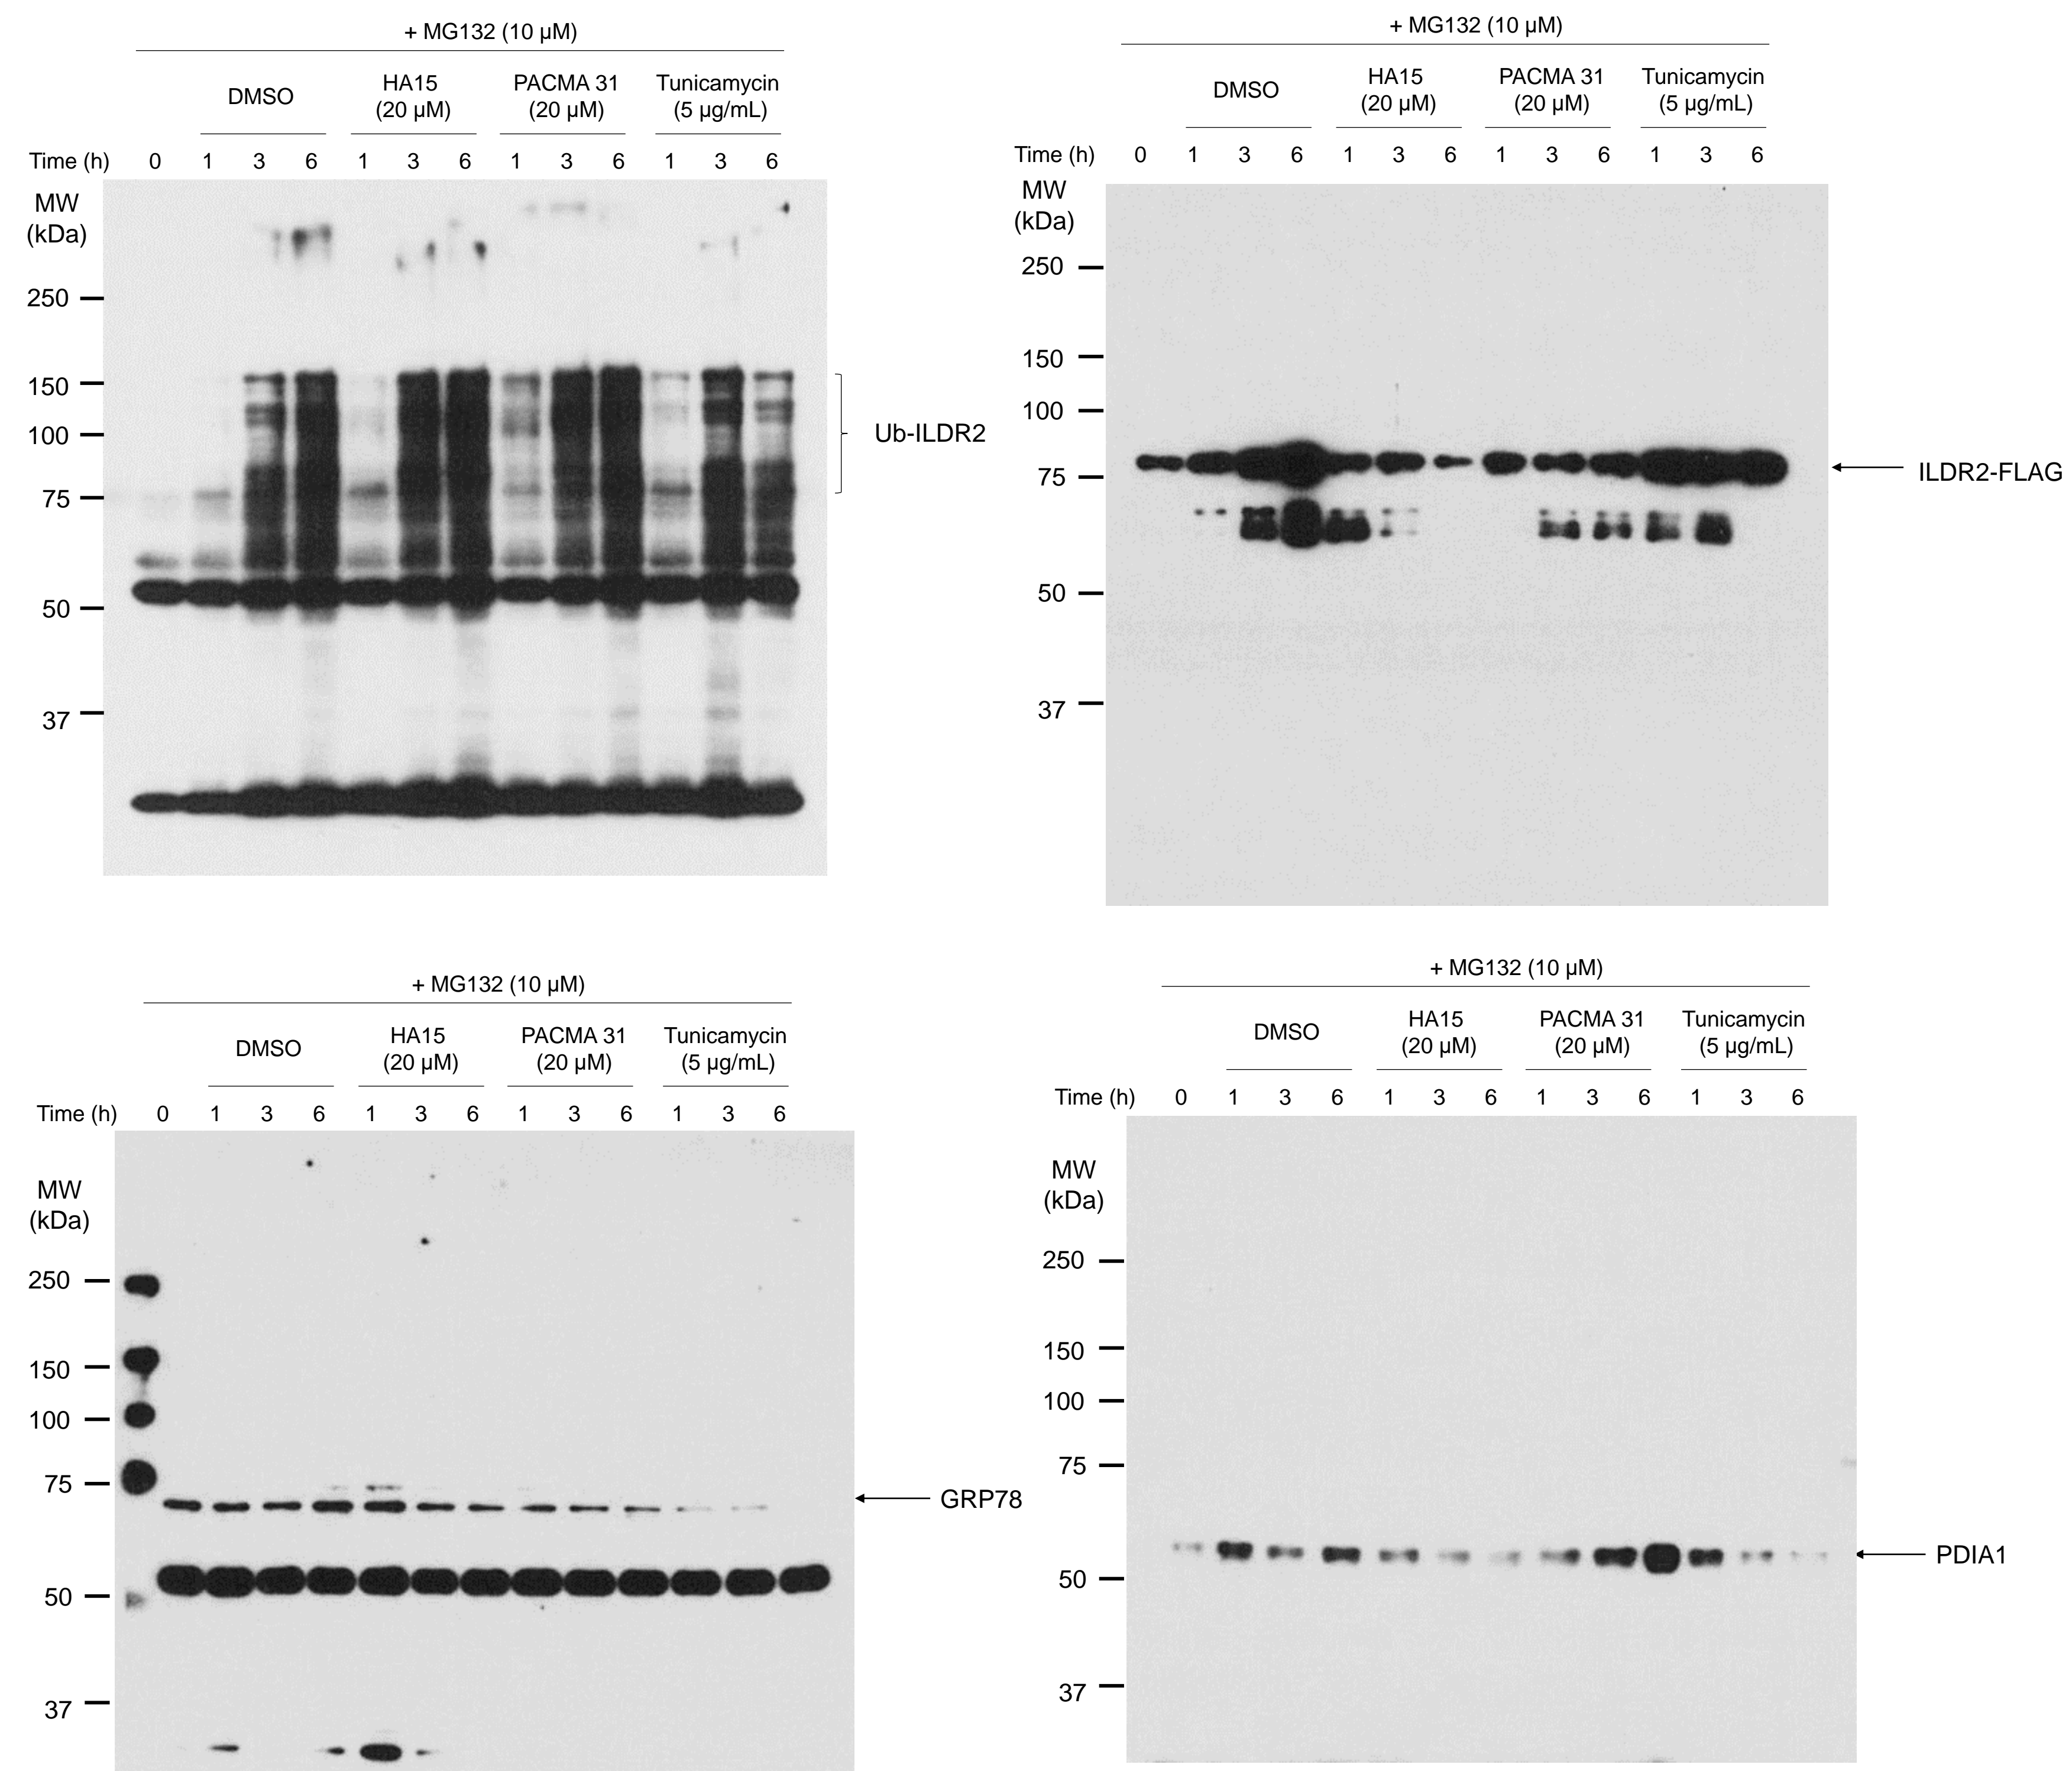

whole cell lysate

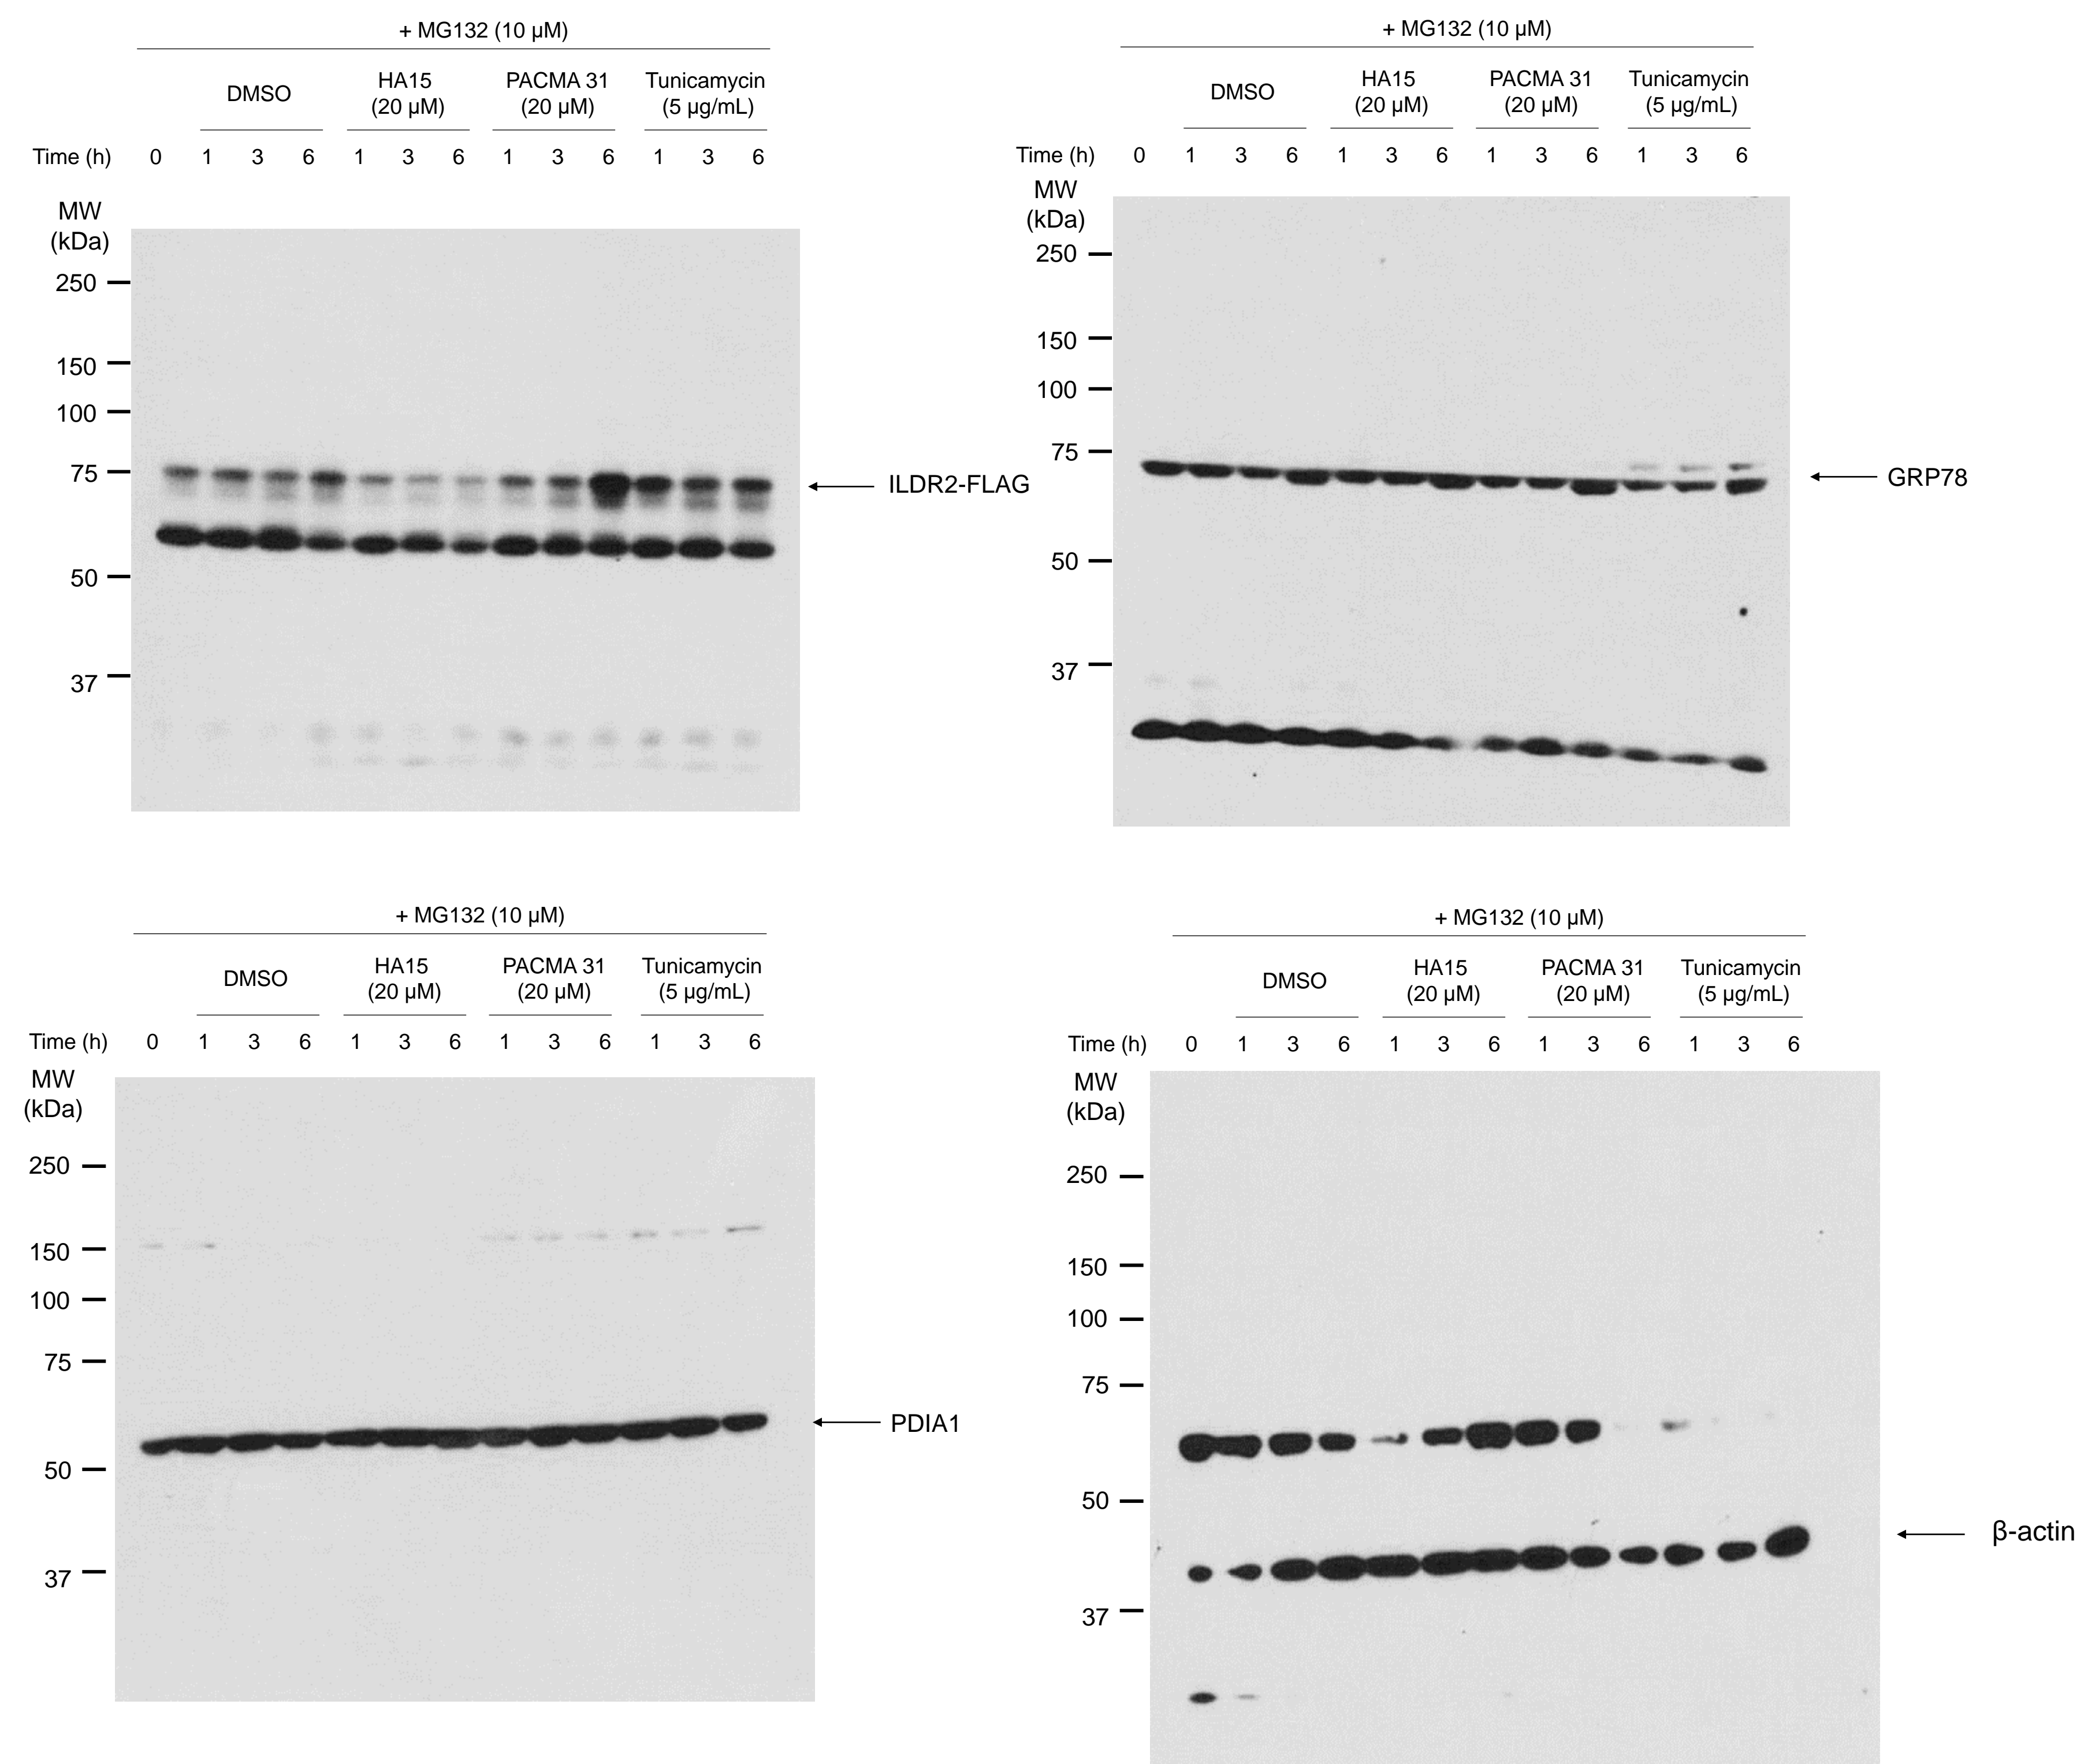

Figure 5c

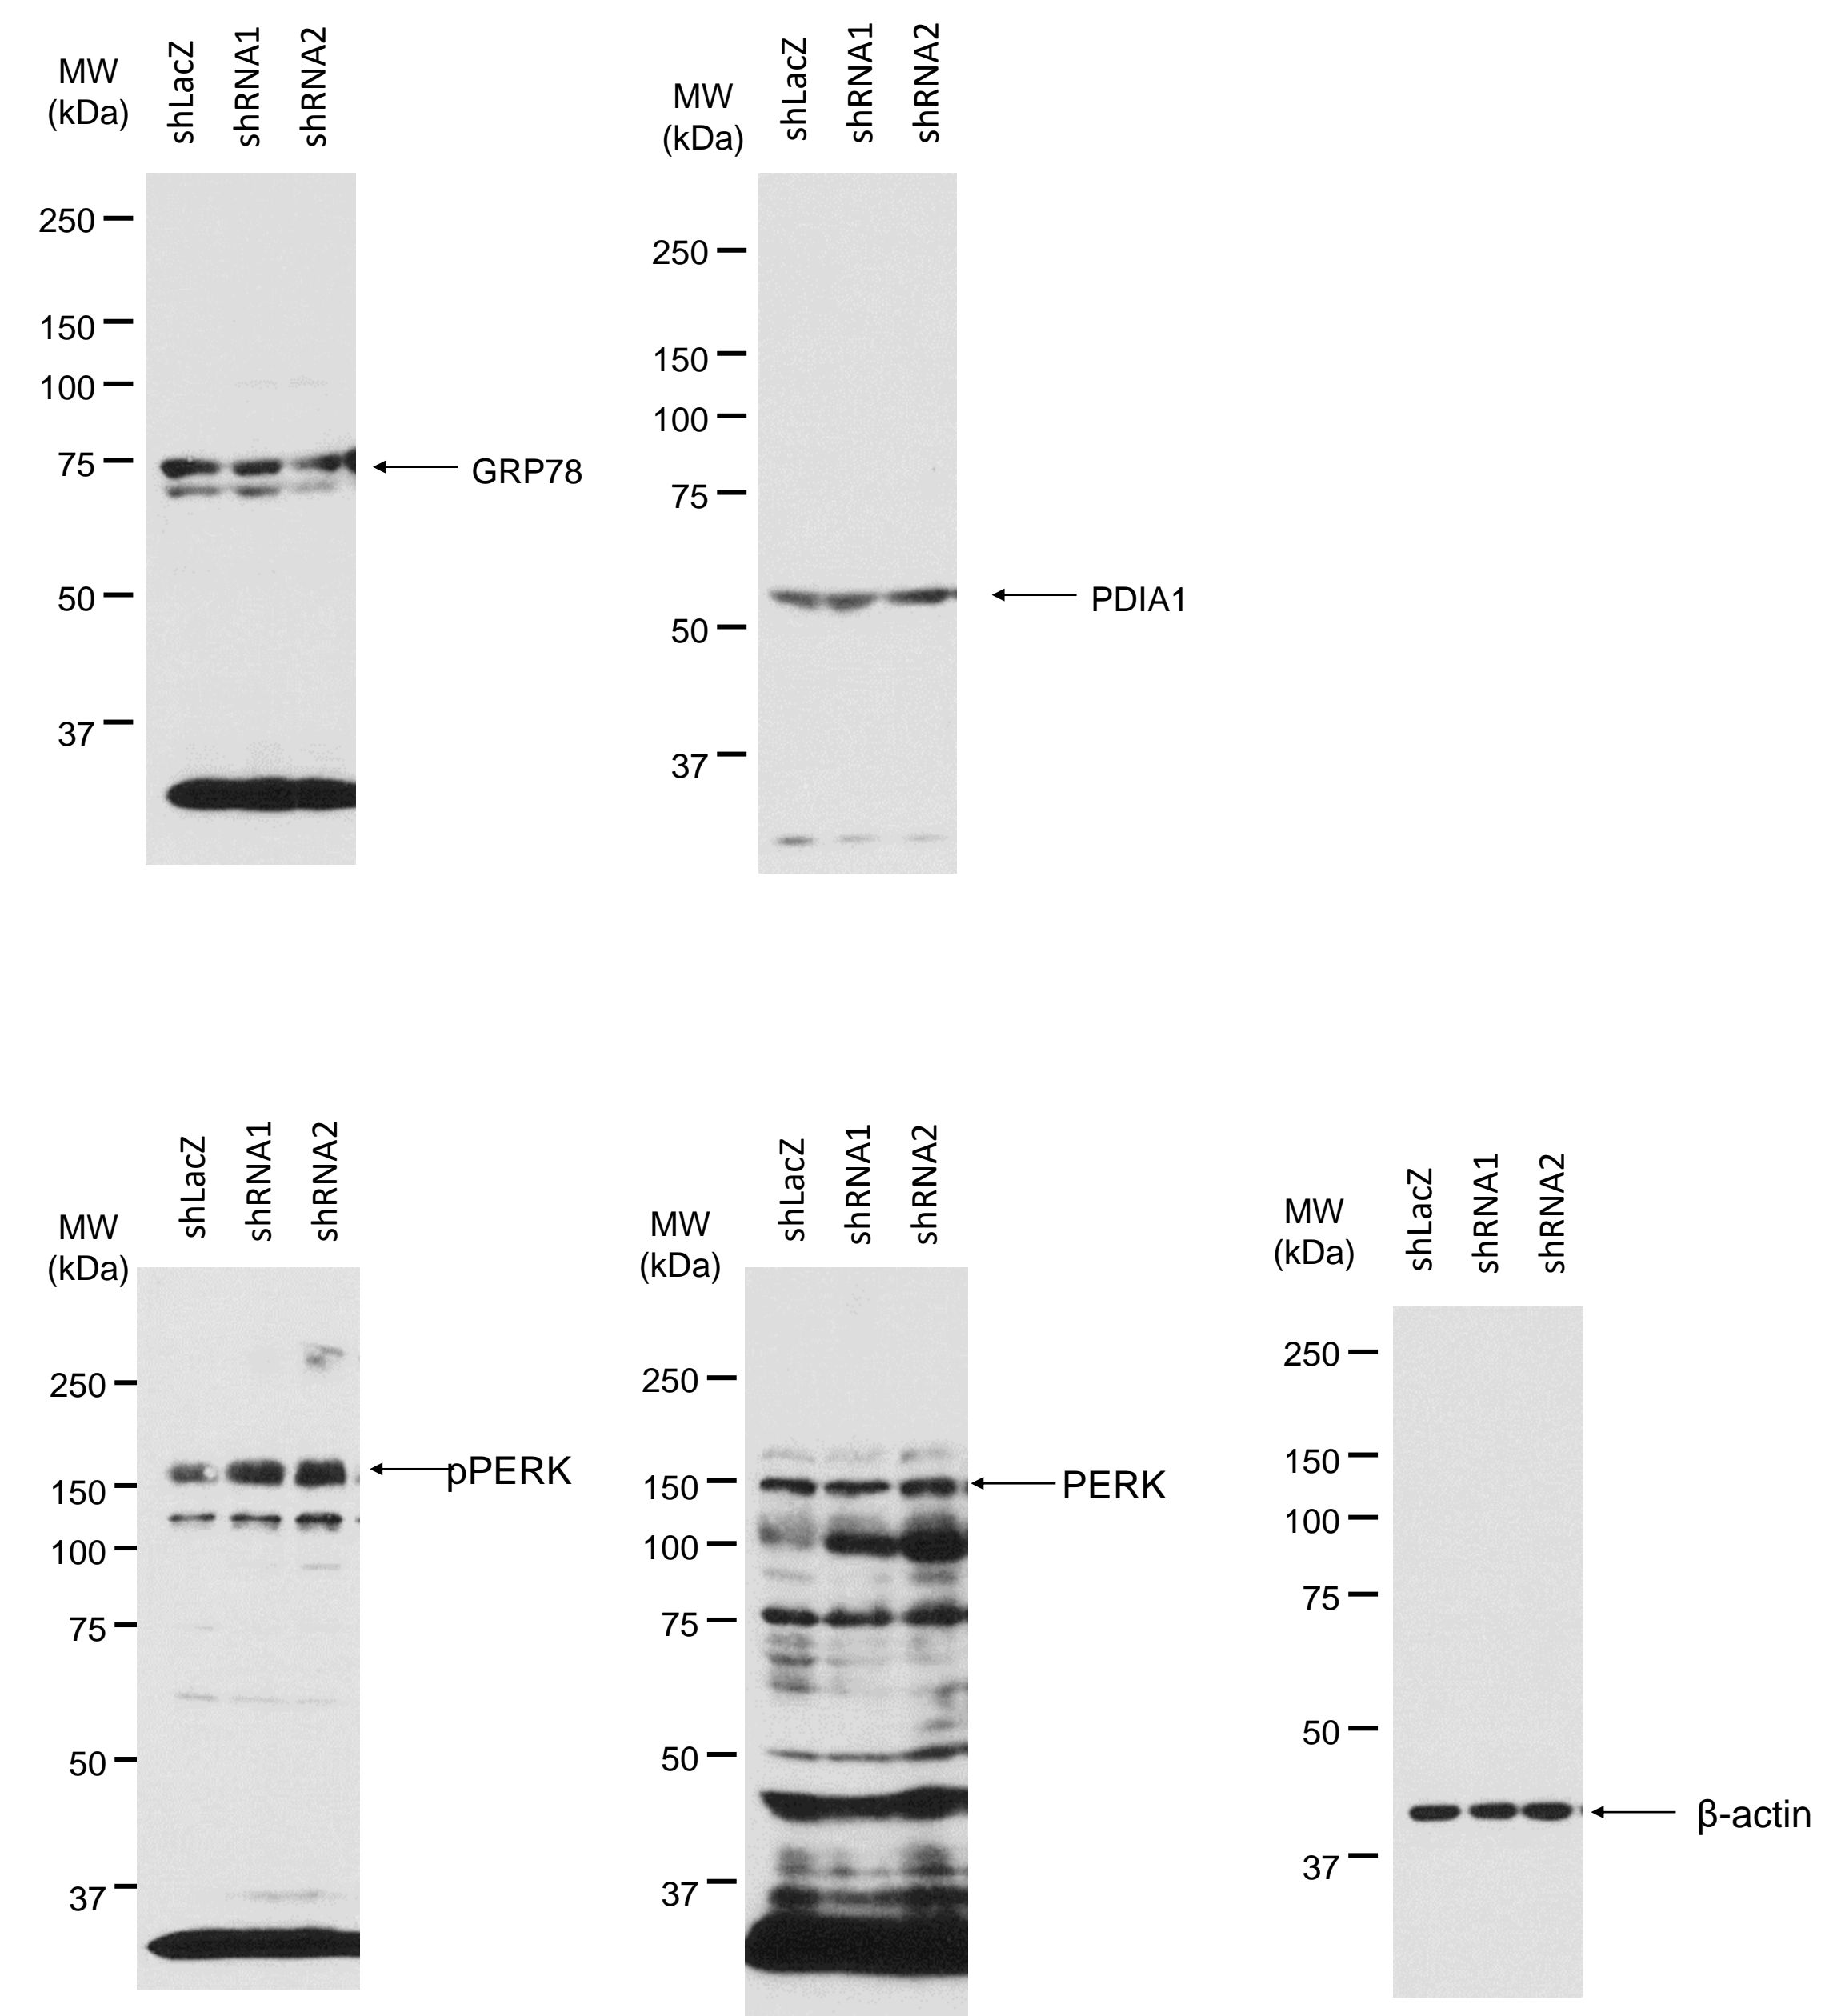

Supplement: 41598_2021_87884_MOESM3_ESM.pdf [file 41598_2021_87884_MOESM3_ESM.pdf]
